# Supplementary material for: Intestinal microbe-dependent ω3 lipid metabolite αKetoA prevents inflammatory diseases in mice and cynomolgus macaques
Source: PubMed Central journal article supplement (PMC8866125; doi:10.1038/s41385-021-00477-5), 2022-01-10
Supplement: 41385_2021_477_MOESM2_ESM.pdf [file 41385_2021_477_MOESM2_ESM.pdf]

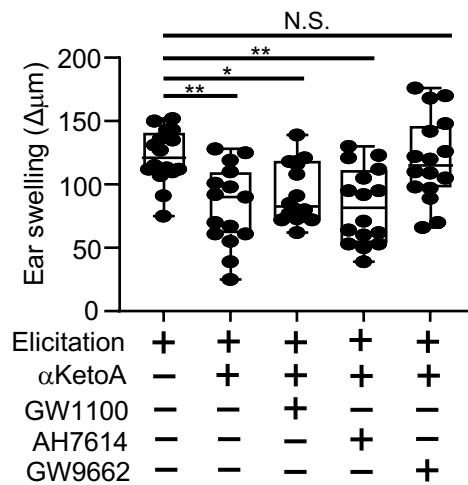

**Supplementary Fig. S1** Contact hypersensitivity is ameliorated by  $\alpha$ KetoA through a PPAR $\gamma$ -dependent manner. Mice were injected intraperitoneally with either GW1100, AH7614 or GW9662 30 minutes before oral administration of  $\alpha$ KetoA on days 0 and 5. Mice were challenged with DNFB 90 minutes after the oral administration of  $\alpha$ KetoA, and ear swelling was evaluated on day 7. Data are combined from 3 independent experiments and each point represents data from individual mice. Statistical significance was evaluated by using one-way ANOVA; \*\* $p < 0.01$ ; \* $p < 0.05$ ; N.S., not significant.

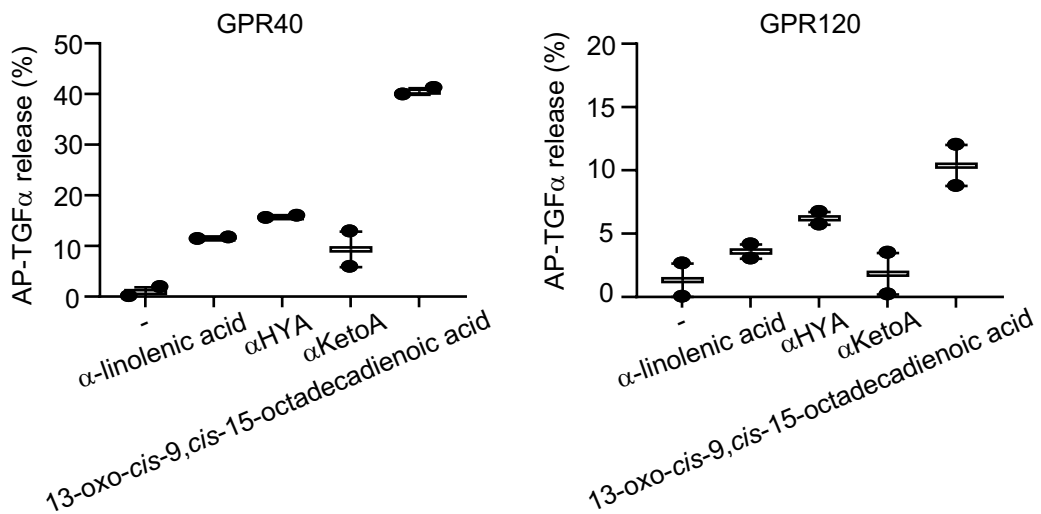

**Supplementary Fig. S2**  $\alpha$ KetoA has little agonistic activity to GPR40 and GPR120. TGF $\alpha$ -shedding assays were performed to evaluate the agonistic activities of the indicated fatty acids to GPR40 and GPR120; 13-oxo-cis-9,cis-15-octadecadienoic acid was used as a positive control. Data are representative of 3 independent experiments with similar results (duplicate assays).

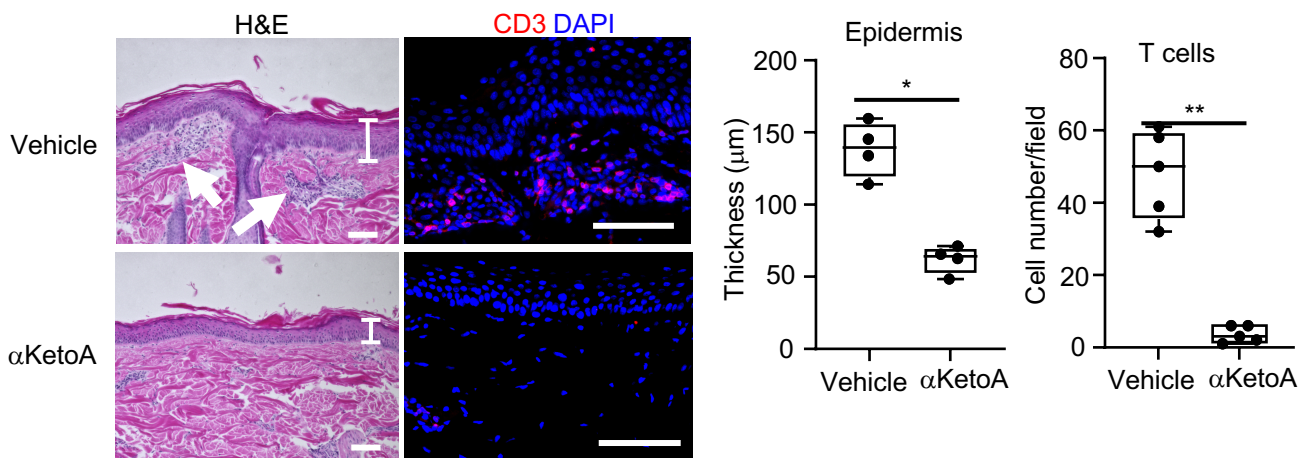

**Supplementary Fig. S3** Contact hypersensitivity is ameliorated by  $\alpha$ KetoA in cynomolgus macaques. DNFB-induced contact hypersensitivity was induced as described in the Methods. Skin biopsy samples were embedded in paraffin blocks, and resulting sections were analyzed by using hematoxylin & eosin staining or the indicated antibodies and reagent. Data are representative of 2 independent experiments ( $n = 2/\text{group}$ ). Arrows indicate cell infiltration, and bars indicate thickening of the epidermis. Scale bars, 100  $\mu\text{m}$ . Epidermal thickness and numbers of T cells were evaluated histologically ( $n = 4$  or 5 sections/group). Statistical significance was evaluated by using the Mann–Whitney test;  $**p < 0.01$ ;  $*p < 0.05$ .

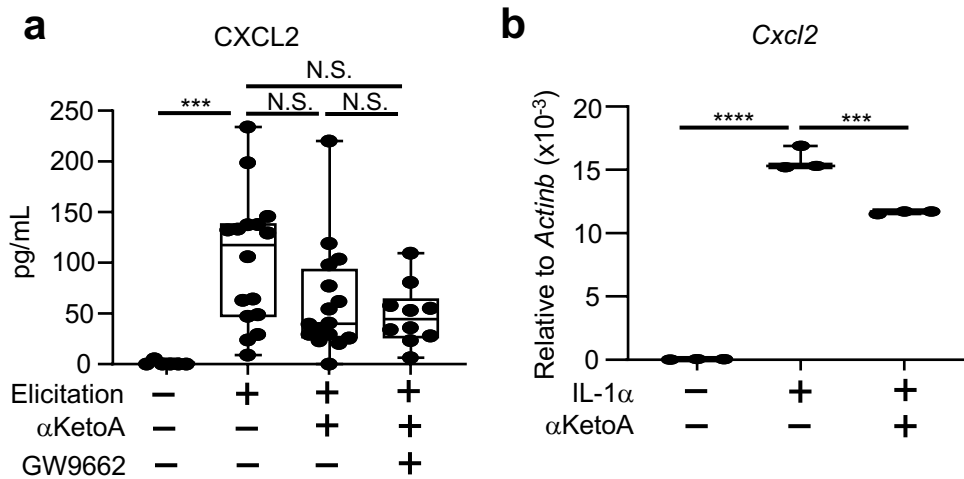

**Supplementary Fig. S4** Effects of  $\alpha$ KetoA on the expression of CXCL2. **a** Ear homogenates were prepared on days 6 and 7 of the contact hypersensitivity model and examined by ELISA to determine the amount of CXCL2. Data are combined from 5 independent experiments. **b** *In vitro* assay of bone marrow-derived macrophages. Bone marrow cells were incubated as described in the Methods section and stimulated with IL-1 $\alpha$  with or without  $\alpha$ KetoA to analyze the gene expression level of *Cxcl2*, which was normalized to that of *Actinb*. Data are representative of 3 independent experiments with similar results (triplicate assays). Statistical significance was evaluated by using one-way ANOVA; \*\*\*\* $p$  < 0.0001; \*\*\* $p$  < 0.001; N.S., not significant.

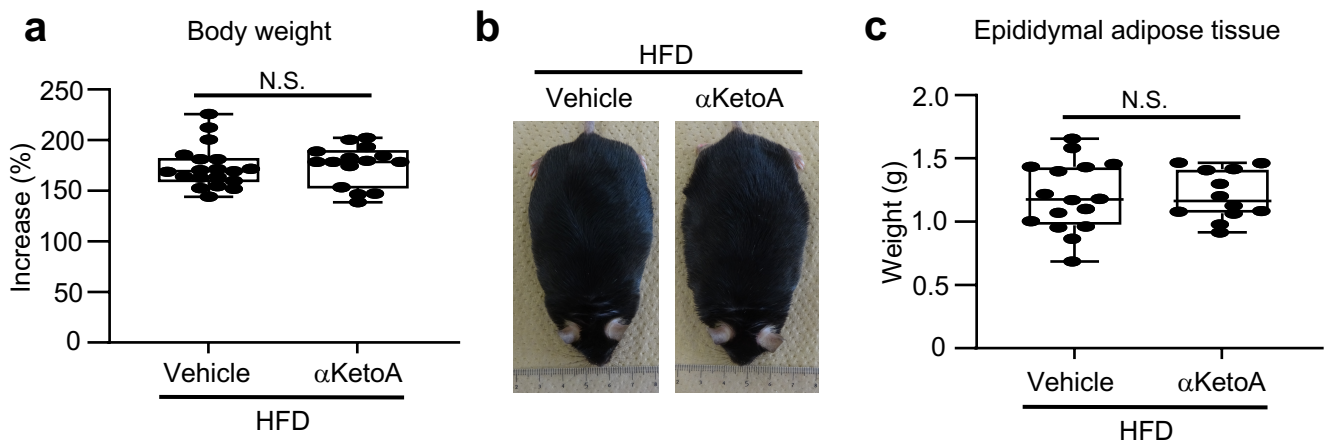

**Supplementary Fig. S5**  $\alpha$ KetoA has little effect on the development of HFD-induced obesity. **a** Mice were fed HFD for 3 months with or without oral administration of  $\alpha$ KetoA (dose: 10  $\mu$ g/mouse, 3 times/week) and their body weight measured. **b-c** Representative photograph of mice (**b**) and the weight of epididymal adipose tissues (**c**) after feeding of HFD for 4 months with or without oral administration of  $\alpha$ KetoA (dose: 10  $\mu$ g/mouse, 3 times/week). Data are combined from 4 independent experiments, and each point represents an individual mouse. Statistical significance was evaluated by using the Mann–Whitney test; N.S., not significant.

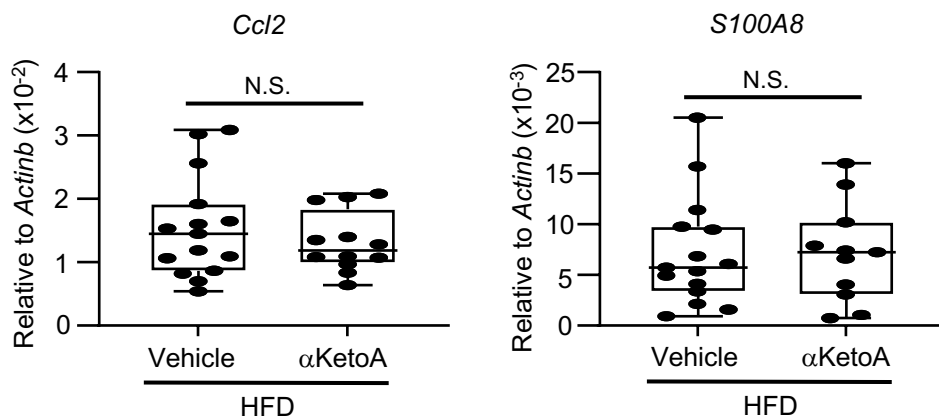

**Supplementary Fig. S6**  $\alpha$ KetoA has little effect on the gene expression levels of *Ccl2* and *S100A8*. After mice were fed a HFD for 4 months with or without oral administration of  $\alpha$ KetoA (dose: 10  $\mu$ g/mouse, 3 times/week), mature adipocytes were fractionated, and the gene expression levels of *Ccl2* and *S100a8* were examined by reverse transcription and quantitative PCR analysis. Data are combined from 4 independent experiments, and each point represents an individual mouse. Statistical significance was evaluated by using the Mann-Whitney test; N.S., not significant.

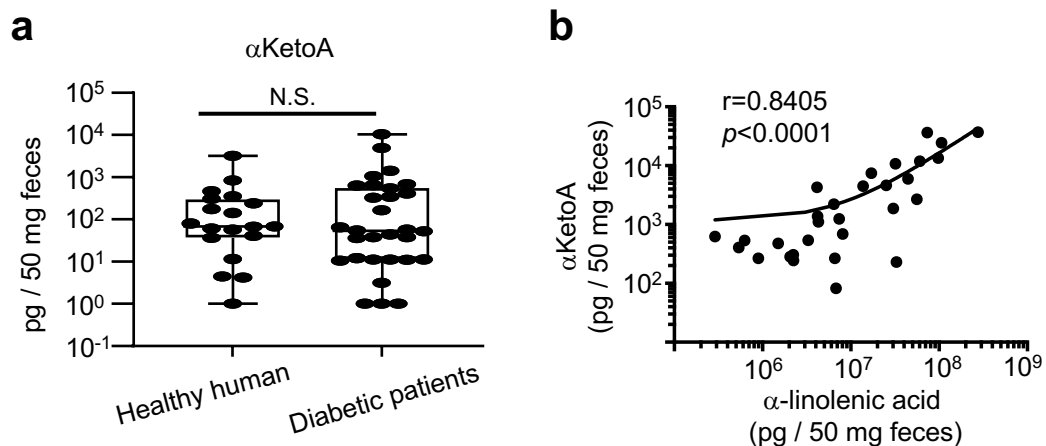

**Supplementary Fig. S7** Detection of  $\alpha$ KetoA in human feces. **a** Human fecal samples were collected from diabetic patients ( $n=30$  [18 males, 12 females], age= $58.5 \pm 12.5$  [range: 34-78]) and healthy adult volunteers ( $n=19$  [14 males, 5 females], age= $52.9 \pm 10.9$  [range: 34-75]), who were recruited from Shunan City Shinnanyo Hospital and the communities around the Shinnanyo Hospital at Shunan city, Yamaguchi, Japan. Feces were examined by LC-MS/MS for the detection of  $\alpha$ KetoA, and their amounts were compared between healthy and diabetic patients. Statistical significance was evaluated by using the Mann–Whitney test; N.S., not significant. **b** Human fecal samples were collected from healthy adult volunteers ( $n=30$  [10 males, 20 females], age= $41.1 \pm 10.7$  [range: 25-63]) who were recruited from the communities around NIBIOHN at Ibaraki City, Osaka, Japan. Feces were examined by LC-MS/MS for the quantification of  $\alpha$ KetoA and  $\alpha$ -linolenic acid. Statistical correlation was evaluated by using Pearson  $r$ .
